# Supplementary material for: Remote Sensing for Maritime Traffic Understanding
Source: MDPI journal article supplement (doi:10.3390/rs16030557), 2024-01-31
Supplement: s1 [file s1]

Archive with 1 entries (1 files):
- SupplementaryMaterials.pdf
