# Supplementary material for: Remote Sensing for Maritime Traffic Understanding
Source: MDPI journal article supplement (doi:10.3390/rs16030557), 2024-01-31

## Modules Block Diagrams

The following series of block diagrams provides a visual representation of the functionalities of each module in the pipeline.

### Ship Detection

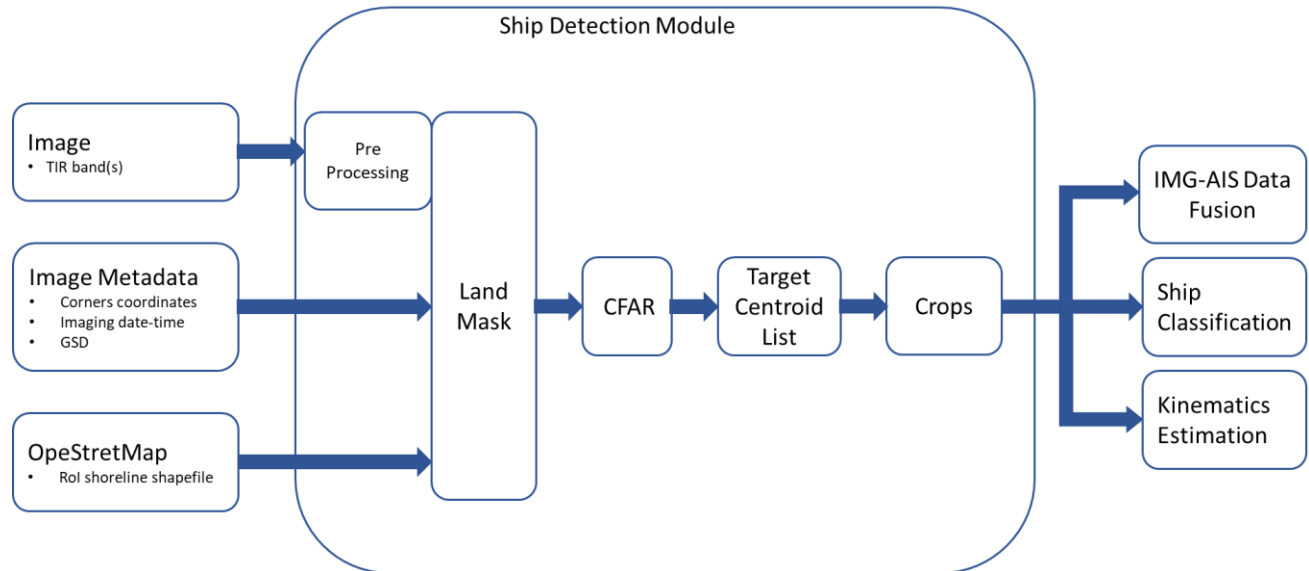

### Ship Classification

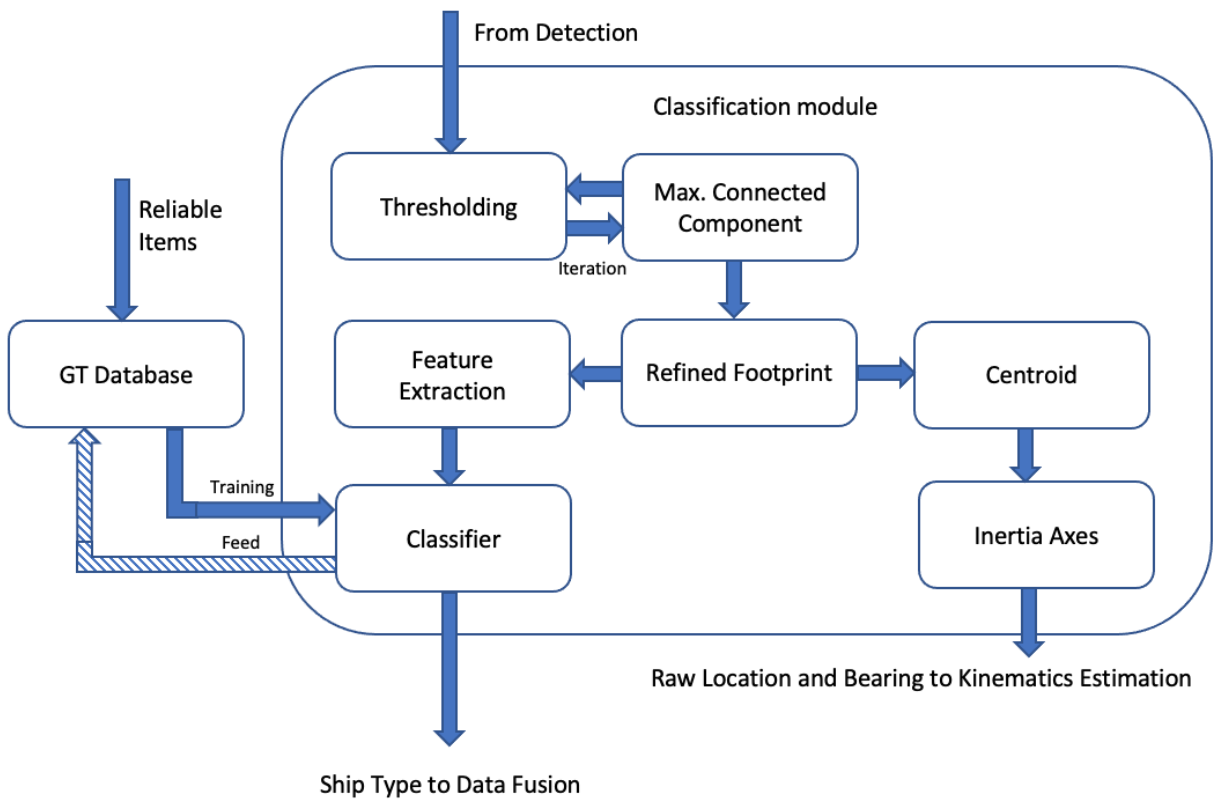

## Ship Kinematics Estimation

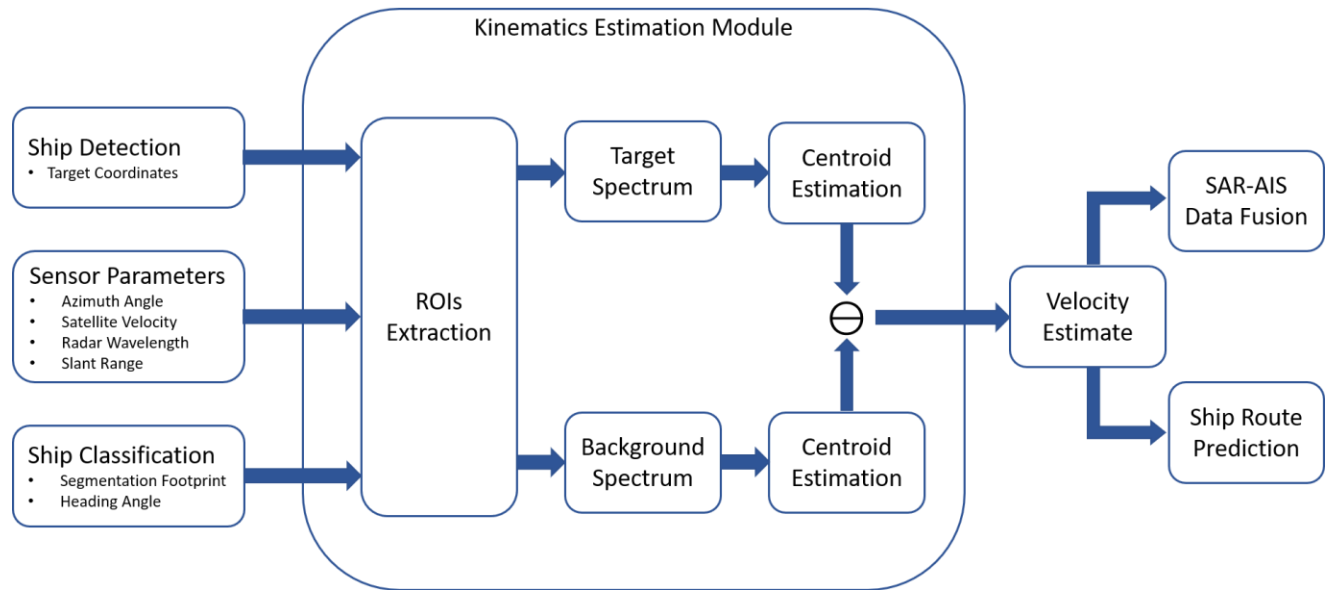

## SAR-AIS Data Fusion

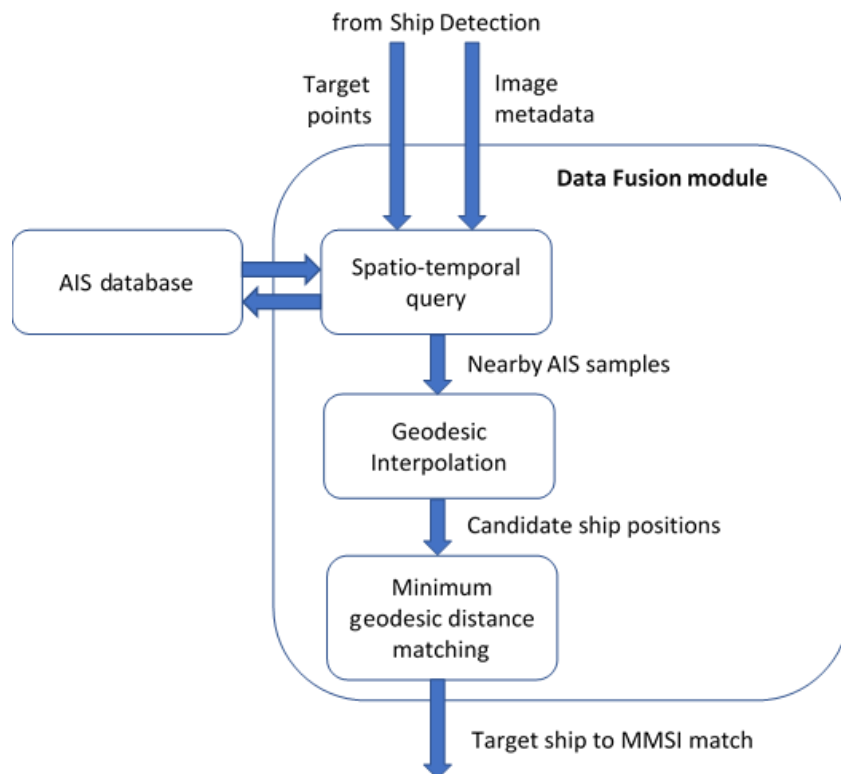

## Ship Route Prediction

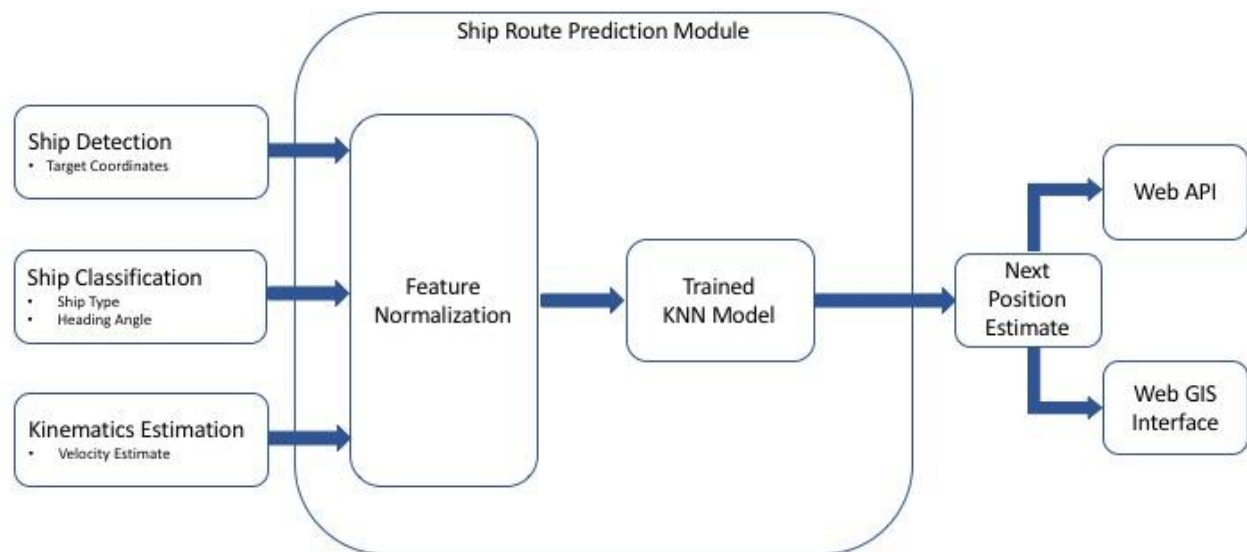

Supplement: s1 [file s1 › SupplementaryMaterials.pdf]
